# Supplementary material
Source: publisher figshare collection journal article supplement (https://sage.figshare.com/ndownloader/files/31635233)
Supplement: Supplementary file 1 [file 31635233]

**Promoting Readiness of Minors in SSI (PROMISE):**

**Early Impacts from a Multi-Site Random Assignment Evaluation**

**Online Appendix Tables**

Online Appendix Tables A.1a–g. Sample Baseline Characteristics, by Project and pooled across projects

Online Appendix Table A.2. Control Variables for Regression-adjusted Analyses of Impacts

Online Appendix Tables A.3a–g. Additional Impact Statistics, by Project and pooled across projects

## PROMISE Early Impacts

Online Appendix Table A.1a. Arkansas PROMISE sample baseline characteristics(percentage, unless otherwise noted)

|                                                             | All    | Treatment | Control | Difference | p-value |
|-------------------------------------------------------------|--------|-----------|---------|------------|---------|
| Demographic characteristics                                 |        |           |         |            |         |
| Youth sex is female                                         | 33.9   | 33.6      | 34.2    | -0.7       | 0.78    |
| Youth age at RA                                             |        |           |         |            |         |
| 14 years                                                    | 39.4   | 38.4      | 40.4    | -2.0       | 0.42    |
| 15 years                                                    | 27.4   | 26.7      | 28.0    | -1.3       | 0.57    |
| 16 years                                                    | 33.2   | 34.9      | 31.5    | 3.4        | 0.17    |
| Average age                                                 | 15.4   | 15.4      | 15.3    | 0.1        | 0.23    |
| Youth language preference at SSI application                |        |           |         |            |         |
| English is preferred written language                       | 97.3   | 97.5      | 97.0    | 0.6        | 0.51    |
| English is preferred spoken language                        | 97.2   | 97.4      | 97.0    | 0.4        | 0.62    |
| Youth living arrangement at SSI application                 |        |           |         |            |         |
| In parents' household                                       | 86.5   | 85.6      | 87.5    | -1.9       | 0.29    |
| Own household or alone                                      | 12.4   | 13.1      | 11.7    | 1.4        | 0.42    |
| Another household and receiving support                     | 1.0    | 1.3       | 0.8     | 0.5        | 0.34    |
| Youth race/ethnicity (from the 18-month survey)             |        |           |         |            |         |
| Non-Hispanic white                                          | 22.1   | 21.4      | 22.8    | -1.3       | 0.54    |
| Non-Hispanic black                                          | 58.4   | 59.0      | 57.8    | 1.2        | 0.65    |
| Hispanic                                                    | 8.2    | 7.6       | 8.7     | -1.1       | 0.43    |
| Non-Hispanic American Indian                                | 0.9    | 0.8       | 1.1     | -0.3       | 0.53    |
| Non-Hispanic other or mixed race                            | 8.3    | 9.3       | 7.4     | 1.9        | 0.19    |
| Missing                                                     | 2.1    | 2.0       | 2.2     | -0.3       | 0.73    |
| Enrolling parent age at RA (from the RA system)             | 42.2   | 42.1      | 42.3    | -0.2       | 0.64    |
| Parent race/ethnicity (from the 18-month survey)            |        |           |         |            |         |
| Non-Hispanic white                                          | 26.6   | 26.0      | 27.2    | -1.2       | 0.59    |
| Non-Hispanic black                                          | 58.9   | 60.0      | 57.7    | 2.4        | 0.36    |
| Hispanic                                                    | 6.1    | 5.7       | 6.5     | -0.8       | 0.54    |
| Non-Hispanic American Indian                                | 1.0    | 0.7       | 1.2     | -0.6       | 0.27    |
| Non-Hispanic other or mixed race                            | 5.9    | 6.3       | 5.6     | 0.7        | 0.58    |
| Missing                                                     | 1.6    | 1.3       | 1.8     | -0.5       | 0.48    |
| Disability                                                  |        |           |         |            |         |
| Youth primary impairment                                    |        |           |         |            |         |
| Intellectual or developmental disability                    | 42.1   | 42.5      | 41.6    | 0.9        | 0.72    |
| Speech, hearing, or visual impairment                       | 1.0    | 1.0       | 0.9     | 0.1        | 0.80    |
| Physical disability                                         | 9.3    | 8.8       | 9.9     | -1.1       | 0.49    |
| Other mental impairment                                     | 44.6   | 44.4      | 44.8    | -0.3       | 0.90    |
| Other or unknown disability                                 | 3.0    | 3.2       | 2.8     | 0.3        | 0.69    |
| SSA program participation                                   |        |           |         |            |         |
| Youth SSA payment status at RA                              |        |           |         |            |         |
| Received SSI                                                | 93.8   | 92.4      | 95.3    | -2.9       | 0.02**  |
| Received OASDI                                              | 15.2   | 15.2      | 15.2    | 0.1        | 0.98    |
| Years since youth's earliest SSI eligibility at RA          | 8.7    | 8.7       | 8.7     | 0.0        | 1.00    |
| Youth age at most recent SSI application                    | 7.0    | 7.1       | 7.0     | 0.1        | 0.65    |
| Average youth payments in the year before RA (\$)           |        |           |         |            |         |
| SSI                                                         | 7,225  | 7,200     | 7,251   | -51        | 0.66    |
| OASDI                                                       | 446    | 447       | 445     | 1          | 0.99    |
| Total SSI and OASDI                                         | 7,671  | 7,647     | 7,697   | -50        | 0.60    |
| Household had multiple SSI-eligible children                | 28.1   | 27.5      | 28.8    | -1.3       | 0.58    |
| Enrolling parent provided a valid SSN at RA                 | 90.8   | 90.5      | 91.1    | -0.7       | 0.65    |
| Parents included in the SSA data analyses                   |        |           |         |            |         |
| None                                                        | 1.7    | 1.9       | 1.5     | 0.4        | 0.51    |
| One parent                                                  | 64.0   | 62.2      | 65.9    | -3.7       | 0.14    |
| Two parents                                                 | 34.2   | 35.8      | 32.6    | 3.2        | 0.19    |
| Parent SSA payment status at RA                             |        |           |         |            |         |
| Any parent received SSI only                                | 10.5   | 10.1      | 10.8    | -0.6       | 0.69    |
| Any parent received OASDI only                              | 11.9   | 12.0      | 11.9    | 0.1        | 0.94    |
| Any parent received both SSI and OASDI                      | 7.9    | 8.3       | 7.4     | 0.8        | 0.55    |
| No parent received any SSA payments                         | 68.0   | 67.6      | 68.4    | -0.8       | 0.75    |
| No parent was included in the SSA data analyses             | 1.7    | 1.9       | 1.5     | 0.4        | 0.51    |
| Earnings <sup>a</sup>                                       |        |           |         |            |         |
| Youth had earnings in the calendar year before RA           | 0.8    | 0.9       | 0.8     | 0.1        | 0.80    |
| Average youth earnings in the calendar year before RA (\$)  | 13     | 6         | 20      | -15        | 0.14    |
| Parent had earnings in the calendar year before RA          | 70.9   | 71        | 70.8    | 0.2        | 0.92    |
| Average parent earnings in the calendar year before RA (\$) | 14,481 | 14,809    | 14,156  | 653        | 0.40    |
| Sample size                                                 | 1,469  | 750       | 719     |            |         |

Table notes shown after Online Appendix Table A.1g.

## PROMISE Early Impacts

Online Appendix Table A.1b. ASPIRE research sample baseline characteristics (percentage, unless otherwise noted)

|                                                            | All    | Treatment | Control | Difference | p-value |
|------------------------------------------------------------|--------|-----------|---------|------------|---------|
| Demographic characteristics                                |        |           |         |            |         |
| Youth sex is female                                        | 32.6   | 32.5      | 32.8    | -0.2       | 0.92    |
| Youth age at RA                                            |        |           |         |            |         |
| 14 years                                                   | 37.9   | 37.5      | 38.3    | -0.7       | 0.76    |
| 15 years                                                   | 31.1   | 31.1      | 31.1    | 0.0        | 1.00    |
| 16 years                                                   | 31.0   | 31.3      | 30.6    | 0.7        | 0.75    |
| Average age                                                | 15.4   | 15.4      | 15.4    | 0.0        | 0.86    |
| Youth language preference at SSI application               |        |           |         |            |         |
| English is preferred written language                      | 91.6   | 91.4      | 91.8    | -0.4       | 0.75    |
| English is preferred spoken language                       | 91.2   | 91.0      | 91.4    | -0.5       | 0.74    |
| Youth living arrangement at SSI application                |        |           |         |            |         |
| In parents' household                                      | 83.5   | 84.0      | 83.1    | 0.9        | 0.64    |
| Own household or alone                                     | 13.7   | 14.0      | 13.4    | 0.6        | 0.73    |
| Another household and receiving support                    | 2.8    | 2.1       | 3.5     | -1.5       | 0.07*   |
| Youth race/ethnicity (from the 18-month survey)            |        |           |         |            |         |
| Non-Hispanic white                                         | 34.3   | 35.2      | 33.4    | 1.7        | 0.44    |
| Non-Hispanic black                                         | 10.9   | 9.5       | 12.3    | -2.8       | 0.07*   |
| Hispanic                                                   | 35.1   | 36.0      | 34.1    | 1.8        | 0.42    |
| Non-Hispanic American Indian                               | 6.9    | 6.9       | 6.9     | 0.1        | 0.96    |
| Non-Hispanic other or mixed race                           | 7.5    | 7.6       | 7.3     | 0.3        | 0.83    |
| Missing                                                    | 5.3    | 4.8       | 5.9     | -1.1       | 0.32    |
| Enrolling parent age at RA (from the RA system)            | 43.9   | 43.8      | 44.0    | -0.2       | 0.69    |
| Parent race/ethnicity (from the 18-month survey)           |        |           |         |            |         |
| Non-Hispanic white                                         | 42.6   | 43.3      | 41.8    | 1.5        | 0.52    |
| Non-Hispanic black                                         | 10.9   | 10.1      | 11.6    | -1.5       | 0.35    |
| Hispanic                                                   | 31.6   | 32.2      | 31.0    | 1.2        | 0.58    |
| Non-Hispanic American Indian                               | 6.2    | 6.5       | 5.9     | 0.6        | 0.63    |
| Non-Hispanic other or mixed race                           | 5.6    | 4.9       | 6.2     | -1.2       | 0.28    |
| Missing                                                    | 3.2    | 2.8       | 3.5     | -0.6       | 0.47    |
| Disability                                                 |        |           |         |            |         |
| Youth primary impairment                                   |        |           |         |            |         |
| Intellectual or developmental disability                   | 44.7   | 46.5      | 43.0    | 3.5        | 0.17    |
| Speech, hearing, or visual impairment                      | 2.7    | 2.4       | 2.9     | -0.5       | 0.52    |
| Physical disability                                        | 19.0   | 19.7      | 18.3    | 1.3        | 0.50    |
| Other mental impairment                                    | 28.8   | 26.5      | 31.2    | -4.7       | 0.04**  |
| Other or unknown disability                                | 4.8    | 5.0       | 4.5     | 0.5        | 0.66    |
| SSA program participation                                  |        |           |         |            |         |
| Youth SSA payment status at RA                             |        |           |         |            |         |
| Received SSI                                               | 91.4   | 91.4      | 91.4    | 0.0        | 0.99    |
| Received OASDI                                             | 10.6   | 11.9      | 9.2     | 2.7        | 0.09*   |
| Years since youth's earliest SSI eligibility at RA         | 8.8    | 8.9       | 8.8     | 0.1        | 0.51    |
| Youth age at most recent SSI application                   | 7.2    | 7.0       | 7.3     | -0.3       | 0.19    |
| Average youth payments in the year before RA (\$)          |        |           |         |            |         |
| SSI                                                        | 7,112  | 7,062     | 7,164   | -102       | 0.39    |
| OASDI                                                      | 309    | 310       | 307     | 2          | 0.97    |
| Total SSI and OASDI                                        | 7,421  | 7,372     | 7,471   | -99        | 0.37    |
| Household had multiple SSI-eligible children               | 18.0   | 18.8      | 17.3    | 1.5        | 0.45    |
| Enrolling parent provided a valid SSN at RA                | 71.5   | 71.7      | 71.3    | 0.4        | 0.87    |
| Parents included in the SSA data analyses                  |        |           |         |            |         |
| None                                                       | 8.5    | 7.8       | 9.2     | -1.4       | 0.31    |
| One parent                                                 | 49.5   | 49.7      | 49.2    | 0.6        | 0.83    |
| Two parents                                                | 42.0   | 42.4      | 41.6    | 0.9        | 0.73    |
| Parent SSA payment status at RA                            |        |           |         |            |         |
| Any parent received SSI only                               | 9.2    | 8.8       | 9.6     | -0.8       | 0.57    |
| Any parent received OASDI only                             | 9.9    | 10.5      | 9.2     | 1.3        | 0.38    |
| Any parent received both SSI and OASDI                     | 4.3    | 4.4       | 4.2     | 0.2        | 0.83    |
| No parent received any SSA payments                        | 68.1   | 68.5      | 67.8    | 0.7        | 0.77    |
| No parent was included in the SSA data analyses            | 8.5    | 7.8       | 9.2     | -1.4       | 0.31    |
| Earnings <sup>a</sup>                                      |        |           |         |            |         |
| Youth had earnings in the calendar year before RA          | 1.4    | 1.4       | 1.4     | 0.0        | 0.99    |
| Average youth earnings in the calendar year before RA (\$) | 11     | 11        | 10      | 2          | 0.75    |
| Parent had earnings in the calendar year before RA         | 72.2   | 71.3      | 73.2    | -1.9       | 0.36    |
| Average parent earnings in the calendar year before RA     | 18,691 | 18,817    | 18,563  | 254        | 0.81    |
| Sample size                                                | 1,560  | 784       | 776     |            |         |

Table notes shown after Online Appendix Table A.1g.

# PROMISE Early Impacts

Online Appendix Table A.1c. CaPROMISE sample baseline characteristics(percentage, unless otherwise noted)

|                                                             | All    | Treatment | Control | Difference | p-value |
|-------------------------------------------------------------|--------|-----------|---------|------------|---------|
| Demographic characteristics                                 |        |           |         |            |         |
| Youth sex is female                                         | 32.8   | 31.7      | 34.0    | -2.3       | 0.32    |
| Youth age at RA                                             |        |           |         |            |         |
| 14 years                                                    | 35.2   | 37.0      | 33.3    | 3.7        | 0.12    |
| 15 years                                                    | 31.0   | 30.5      | 31.5    | -1.0       | 0.67    |
| 16 years                                                    | 33.9   | 32.6      | 35.3    | -2.7       | 0.26    |
| Average age                                                 | 15.4   | 15.4      | 15.5    | -0.1       | 0.24    |
| Youth language preference at SSI application                |        |           |         |            |         |
| English is preferred written language                       | 64.3   | 64.9      | 63.7    | 1.2        | 0.59    |
| English is preferred spoken language                        | 64.3   | 64.7      | 63.8    | 0.9        | 0.67    |
| Youth living arrangement at SSI application                 |        |           |         |            |         |
| In parents' household                                       | 76.5   | 74.8      | 78.3    | -3.6       | 0.09*   |
| Own household or alone                                      | 20.8   | 22.2      | 19.2    | 3.0        | 0.13    |
| Another household and receiving support                     | 2.7    | 3.0       | 2.4     | 0.6        | 0.49    |
| Youth race/ethnicity (from the 18-month survey)             |        |           |         |            |         |
| Non-Hispanic white                                          | 6.8    | 7.7       | 5.8     | 2.0        | 0.12    |
| Non-Hispanic black                                          | 18.4   | 17.6      | 19.4    | -1.8       | 0.35    |
| Hispanic                                                    | 64.2   | 63.6      | 64.9    | -1.3       | 0.56    |
| Non-Hispanic American Indian                                | 0.8    | 0.7       | 0.8     | -0.1       | 0.85    |
| Non-Hispanic other or mixed race                            | 8.0    | 8.4       | 7.5     | 0.9        | 0.52    |
| Missing                                                     | 1.8    | 2.0       | 1.6     | 0.4        | 0.56    |
| Enrolling parent age at RA (from the RA system)             | 44.2   | 44.4      | 44.0    | 0.4        | 0.31    |
| Parent race/ethnicity (from the 18-month survey)            |        |           |         |            |         |
| Non-Hispanic white                                          | 8.6    | 8.9       | 8.3     | 0.6        | 0.66    |
| Non-Hispanic black                                          | 19.7   | 19.9      | 19.6    | 0.3        | 0.88    |
| Hispanic                                                    | 62.2   | 61.4      | 63.1    | -1.7       | 0.45    |
| Non-Hispanic American Indian                                | 0.4    | 0.2       | 0.7     | -0.4       | 0.26    |
| Non-Hispanic other or mixed race                            | 7.1    | 7.1       | 7.0     | 0.1        | 0.95    |
| Missing                                                     | 1.9    | 2.5       | 1.3     | 1.1        | 0.11    |
| Disability                                                  |        |           |         |            |         |
| Youth primary impairment                                    |        |           |         |            |         |
| Intellectual or developmental disability                    | 47.9   | 46.4      | 49.4    | -3.0       | 0.22    |
| Speech, hearing, or visual impairment                       | 2.8    | 2.9       | 2.8     | 0.1        | 0.89    |
| Physical disability                                         | 18.7   | 17.5      | 20.0    | -2.5       | 0.19    |
| Other mental impairment                                     | 23.6   | 25.1      | 22.2    | 2.9        | 0.17    |
| Other or unknown disability                                 | 6.9    | 8.1       | 5.6     | 2.5        | 0.04**  |
| SSA program participation                                   |        |           |         |            |         |
| Youth SSA payment status at RA                              |        |           |         |            |         |
| Received SSI                                                | 94.3   | 93.4      | 95.3    | -1.8       | 0.12    |
| Received OASDI                                              | 7.0    | 7.8       | 6.2     | 1.6        | 0.22    |
| Years since youth's earliest SSI eligibility at RA          | 9.1    | 8.8       | 9.3     | -0.5       | 0.02**  |
| Youth age at most recent SSI application                    | 6.8    | 6.9       | 6.7     | 0.2        | 0.27    |
| Average youth payments in the year before RA (\$)           |        |           |         |            |         |
| SSI                                                         | 7,394  | 7,292     | 7,501   | -209       | 0.05*   |
| OASDI                                                       | 212    | 262       | 160     | 102        | 0.03**  |
| Total SSI and OASDI                                         | 7,607  | 7,554     | 7,661   | -107       | 0.29    |
| Household had multiple SSI-eligible children                | 14.0   | 14.2      | 13.9    | 0.3        | 0.86    |
| Enrolling parent provided a valid SSN at RA                 | 62.0   | 61.8      | 62.2    | -0.3       | 0.87    |
| Parents included in the SSA data analyses                   |        |           |         |            |         |
| None                                                        | 14.9   | 15.0      | 14.8    | 0.2        | 0.89    |
| One parent                                                  | 50.1   | 52.1      | 48.0    | 4.1        | 0.10*   |
| Two parents                                                 | 35.0   | 32.8      | 37.2    | -4.4       | 0.07*   |
| Parent SSA payment status at RA                             |        |           |         |            |         |
| Any parent received SSI only                                | 6.9    | 6.9       | 6.8     | 0.1        | 0.91    |
| Any parent received OASDI only                              | 6.7    | 7.2       | 6.1     | 1.1        | 0.37    |
| Any parent received both SSI and OASDI                      | 3.1    | 3.3       | 2.8     | 0.5        | 0.57    |
| No parent received any SSA payments                         | 68.4   | 67.5      | 69.5    | -2.0       | 0.39    |
| No parent was included in the SSA data analyses             | 14.9   | 15.0      | 14.8    | 0.2        | 0.89    |
| Earnings <sup>a</sup>                                       |        |           |         |            |         |
| Youth had earnings in the calendar year before RA           | 2.4    | 2.6       | 2.1     | 0.6        | 0.28    |
| Average youth earnings in the calendar year before RA       | 33     | 29        | 37      | -8         | 0.70    |
| Parent had earnings in the calendar year before RA          | 74.4   | 73.2      | 75.6    | -2.5       | 0.14    |
| Average parent earnings in the calendar year before RA (\$) | 18,137 | 17,731    | 18,539  | -808       | 0.28    |
| Sample size                                                 | 1,634  | 834       | 800     |            |         |

Table notes shown after Online Appendix Table A.1g.

# PROMISE Early Impacts

Online Appendix Table A.1d. MD PROMISE sample baseline characteristics(percentage, unless otherwise noted)

|                                                             | All    | Treatment | Control | Difference | p-value |
|-------------------------------------------------------------|--------|-----------|---------|------------|---------|
| Demographic characteristics                                 |        |           |         |            |         |
| Youth sex is female                                         | 35.5   | 33.3      | 37.6    | -4.3       | 0.08*   |
| Youth age at RA                                             |        |           |         |            |         |
| 14 years                                                    | 25.8   | 24.2      | 27.4    | -3.2       | 0.15    |
| 15 years                                                    | 25.9   | 27.0      | 24.8    | 2.1        | 0.35    |
| 16 years                                                    | 48.3   | 48.9      | 47.8    | 1.1        | 0.67    |
| Average age                                                 | 15.8   | 15.8      | 15.7    | 0.0        | 0.35    |
| Youth language preference at SSI application                |        |           |         |            |         |
| English is preferred written language                       | 96.7   | 96.4      | 97.1    | -0.7       | 0.43    |
| English is preferred spoken language                        | 96.4   | 96.1      | 96.7    | -0.6       | 0.55    |
| Youth living arrangement at SSI application                 |        |           |         |            |         |
| In parents' household                                       | 85.8   | 85.2      | 86.4    | -1.2       | 0.50    |
| Own household or alone                                      | 10.7   | 11.5      | 10.0    | 1.5        | 0.36    |
| Another household and receiving support                     | 3.5    | 3.3       | 3.6     | -0.2       | 0.79    |
| Youth race/ethnicity (from the 18-month survey)             |        |           |         |            |         |
| Non-Hispanic white                                          | 18.7   | 18.7      | 18.6    | 0.1        | 0.98    |
| Non-Hispanic black                                          | 61.0   | 59.6      | 62.4    | -2.8       | 0.26    |
| Hispanic                                                    | 8.5    | 9.7       | 7.3     | 2.3        | 0.10    |
| Non-Hispanic American Indian                                | 1.8    | 1.6       | 2.0     | -0.5       | 0.51    |
| Non-Hispanic other or mixed race                            | 7.7    | 8.1       | 7.4     | 0.7        | 0.63    |
| Missing                                                     | 2.3    | 2.4       | 2.2     | 0.2        | 0.78    |
| Enrolling parent age at RA (from the RA system)             | 43.3   | 43.2      | 43.5    | -0.3       | 0.53    |
| Parent race/ethnicity (from the 18-month survey)            |        |           |         |            |         |
| Non-Hispanic white                                          | 23.3   | 22.3      | 24.4    | -2.1       | 0.33    |
| Non-Hispanic black                                          | 61.1   | 60.5      | 61.8    | -1.2       | 0.63    |
| Hispanic                                                    | 6.9    | 7.6       | 6.1     | 1.4        | 0.27    |
| Non-Hispanic American Indian                                | 1.2    | 1.3       | 1.0     | 0.3        | 0.62    |
| Non-Hispanic other or mixed race                            | 5.2    | 5.7       | 4.7     | 1.0        | 0.41    |
| Missing                                                     | 2.2    | 2.6       | 1.9     | 0.7        | 0.38    |
| Disability                                                  |        |           |         |            |         |
| Youth primary impairment                                    |        |           |         |            |         |
| Intellectual or developmental disability                    | 36.8   | 36.4      | 37.2    | -0.8       | 0.74    |
| Speech, hearing, or visual impairment                       | 1.5    | 1.7       | 1.3     | 0.4        | 0.52    |
| Physical disability                                         | 10.7   | 9.9       | 11.6    | -1.8       | 0.27    |
| Other mental impairment                                     | 48.0   | 49.2      | 46.8    | 2.5        | 0.34    |
| Other or unknown disability                                 | 2.9    | 2.8       | 3.0     | -0.3       | 0.76    |
| SSA program participation                                   |        |           |         |            |         |
| Youth SSA payment status at RA                              |        |           |         |            |         |
| Received SSI                                                | 94.9   | 95.4      | 94.5    | 0.9        | 0.44    |
| Received OASDI                                              | 11.3   | 12.1      | 10.5    | 1.7        | 0.31    |
| Years since youth's earliest SSI eligibility at RA          | 8.3    | 8.2       | 8.4     | -0.2       | 0.39    |
| Youth age at most recent SSI application                    | 7.9    | 8.1       | 7.8     | 0.3        | 0.17    |
| Average youth payments in the year before RA (\$)           |        |           |         |            |         |
| SSI                                                         | 7,274  | 7,380     | 7,165   | 214        | 0.08*   |
| OASDI                                                       | 356    | 368       | 344     | 24         | 0.70    |
| Total SSI and OASDI                                         | 7,630  | 7,748     | 7,509   | 238        | 0.03**  |
| Household had multiple SSI-eligible children                | 16.9   | 17.2      | 16.6    | 0.5        | 0.78    |
| Enrolling parent provided a valid SSN at RA                 | 59.5   | 60.1      | 58.9    | 1.2        | 0.63    |
| Parents included in the SSA data analyses                   |        |           |         |            |         |
| None                                                        | 6.1    | 5.9       | 6.3     | -0.4       | 0.75    |
| One parent                                                  | 69.7   | 68.6      | 70.7    | -2.1       | 0.38    |
| Two parents                                                 | 24.3   | 25.5      | 23.0    | 2.5        | 0.26    |
| Parent SSA payment status at RA                             |        |           |         |            |         |
| Any parent received SSI only                                | 8.1    | 8.6       | 7.6     | 1.0        | 0.49    |
| Any parent received OASDI only                              | 8.4    | 9.7       | 7.1     | 2.6        | 0.07*   |
| Any parent received both SSI and OASDI                      | 5.0    | 5.8       | 4.2     | 1.6        | 0.16    |
| No parent received any SSA payments                         | 72.4   | 70.0      | 74.8    | -4.8       | 0.04**  |
| No parent was included in the SSA data analyses             | 6.1    | 5.9       | 6.3     | -0.4       | 0.75    |
| Earnings <sup>a</sup>                                       |        |           |         |            |         |
| Youth had earnings in the calendar year before RA           | 4.4    | 4.5       | 4.3     | 0.2        | 0.84    |
| Average youth earnings in the calendar year before RA (\$)  | 38     | 41        | 34      | 7          | 0.47    |
| Parent had earnings in the calendar year before RA          | 67.9   | 69.0      | 66.9    | 2.1        | 0.35    |
| Average parent earnings in the calendar year before RA (\$) | 15,353 | 15,190    | 15,519  | -329       | 0.73    |
| Sample size                                                 | 1,501  | 759       | 742     |            |         |

Table notes shown after Online Appendix Table A.1g.

# PROMISE Early Impacts

Online Appendix Table A.1e. NYS PROMISE sample baseline characteristics(percentage, unless otherwise noted)

|                                                             | All    | Treatment | Control | Difference | p-value |
|-------------------------------------------------------------|--------|-----------|---------|------------|---------|
| Demographic characteristics                                 |        |           |         |            |         |
| Youth sex is female                                         | 32.1   | 31.8      | 32.4    | -0.6       | 0.78    |
| Youth age at RA                                             |        |           |         |            |         |
| 14 years                                                    | 37.8   | 39.1      | 36.5    | 2.6        | 0.28    |
| 15 years                                                    | 31.6   | 31.1      | 32.2    | -1.0       | 0.65    |
| 16 years                                                    | 30.6   | 29.8      | 31.3    | -1.5       | 0.50    |
| Average age                                                 | 15.4   | 15.3      | 15.4    | -0.1       | 0.23    |
| Youth language preference at SSI application                |        |           |         |            |         |
| English is preferred written language                       | 85.1   | 84.3      | 86.0    | -1.7       | 0.32    |
| English is preferred spoken language                        | 84.9   | 84.5      | 85.3    | -0.8       | 0.64    |
| Youth living arrangement at SSI application                 |        |           |         |            |         |
| In parents' household                                       | 85.3   | 88.0      | 82.5    | 5.5        | 0.00*** |
| Own household or alone                                      | 13.0   | 10.8      | 15.2    | -4.4       | 0.01*** |
| Another household and receiving support                     | 1.8    | 1.2       | 2.3     | -1.1       | 0.09*   |
| Youth race/ethnicity (from the 18-month survey)             |        |           |         |            |         |
| Non-Hispanic white                                          | 7.9    | 7.9       | 7.9     | -0.1       | 0.94    |
| Non-Hispanic black                                          | 40.4   | 38.4      | 42.5    | -4.0       | 0.09*   |
| Hispanic                                                    | 38.8   | 41.6      | 36.0    | 5.6        | 0.02**  |
| Non-Hispanic American Indian                                | 0.9    | 0.7       | 1.0     | -0.3       | 0.57    |
| Non-Hispanic other or mixed race                            | 9.2    | 8.4       | 10.0    | -1.7       | 0.24    |
| Missing                                                     | 2.8    | 3.0       | 2.5     | 0.5        | 0.55    |
| Enrolling parent age at RA (from the RA system)             | 44.3   | 44.2      | 44.3    | -0.1       | 0.77    |
| Parent race/ethnicity (from the 18-month survey)            |        |           |         |            |         |
| Non-Hispanic white                                          | 11.5   | 12.2      | 10.8    | 1.4        | 0.38    |
| Non-Hispanic black                                          | 42.3   | 41.5      | 43.0    | -1.5       | 0.54    |
| Hispanic                                                    | 35.1   | 35.3      | 34.8    | 0.5        | 0.82    |
| Non-Hispanic American Indian                                | 0.9    | 0.3       | 1.4     | -1.0       | 0.02**  |
| Non-Hispanic other or mixed race                            | 7.9    | 8.6       | 7.3     | 1.2        | 0.35    |
| Missing                                                     | 2.3    | 2.0       | 2.6     | -0.6       | 0.38    |
| Disability                                                  |        |           |         |            |         |
| Youth primary impairment                                    |        |           |         |            |         |
| Intellectual or developmental disability                    | 57.3   | 57.4      | 57.2    | 0.2        | 0.95    |
| Speech, hearing, or visual impairment                       | 1.0    | 0.6       | 1.4     | -0.9       | 0.06*   |
| Physical disability                                         | 11.8   | 11.9      | 11.8    | 0.2        | 0.91    |
| Other mental impairment                                     | 26.0   | 26.4      | 25.5    | 0.9        | 0.68    |
| Other or unknown disability                                 | 3.9    | 3.7       | 4.1     | -0.3       | 0.72    |
| SSA program participation                                   |        |           |         |            |         |
| Youth SSA payment status at RA                              |        |           |         |            |         |
| Received SSI                                                | 96.1   | 96.0      | 96.2    | -0.1       | 0.89    |
| Received OASDI                                              | 9.9    | 8.8       | 11.0    | -2.2       | 0.13    |
| Years since youth's earliest SSI eligibility at RA          | 9.7    | 9.8       | 9.6     | 0.2        | 0.40    |
| Youth age at most recent SSI application                    | 6.1    | 5.9       | 6.2     | -0.3       | 0.16    |
| Average youth payments in the year before RA (\$)           |        |           |         |            |         |
| SSI                                                         | 7,566  | 7,621     | 7,510   | 111        | 0.30    |
| OASDI                                                       | 288    | 234       | 343     | -109       | 0.05**  |
| Total SSI and OASDI                                         | 7,854  | 7,855     | 7,853   | 1          | 0.99    |
| Household had multiple SSI-eligible children                | 18.8   | 18.7      | 18.8    | -0.2       | 0.94    |
| Enrolling parent provided a valid SSN at RA                 | 85.0   | 86.3      | 83.8    | 2.5        | 0.14    |
| Parents included in the SSA data analyses                   |        |           |         |            |         |
| None                                                        | 5.6    | 3.7       | 7.6     | -3.9       | 0.00*** |
| One parent                                                  | 67.3   | 68.3      | 66.2    | 2.1        | 0.35    |
| Two parents                                                 | 27.1   | 28.0      | 26.2    | 1.8        | 0.42    |
| Parent SSA payment status at RA                             |        |           |         |            |         |
| Any parent received SSI only                                | 11.7   | 11.9      | 11.5    | 0.5        | 0.76    |
| Any parent received OASDI only                              | 8.7    | 8.0       | 9.4     | -1.4       | 0.31    |
| Any parent received both SSI and OASDI                      | 5.8    | 5.6       | 6.0     | -0.4       | 0.70    |
| No parent received any SSA payments                         | 68.2   | 70.8      | 65.6    | 5.2        | 0.02**  |
| No parent was included in the SSA data                      | 5.6    | 3.7       | 7.6     | -3.9       | 0.00*** |
| Earnings <sup>a</sup>                                       |        |           |         |            |         |
| Youth had earnings in the calendar year before RA           | 6.6    | 6.5       | 6.6     | -0.1       | 0.90    |
| Average youth earnings in calendar year before RA (\$)      | 51     | 49        | 53      | -4         | 0.69    |
| Parent had earnings in calendar year before RA              | 63.2   | 62.5      | 64.0    | -1.5       | 0.50    |
| Average parent earnings in the calendar year before RA (\$) | 13,711 | 14,192    | 13,209  | 983        | 0.24    |
| Sample size                                                 | 1,691  | 853       | 838     |            |         |

Table notes shown after Online Appendix Table A.1g.

# PROMISE Early Impacts

Online Appendix Table A.1f. WI PROMISE sample baseline characteristics(percentage, unless otherwise noted)

|                                                             | All    | Treatment | Control | Difference | p-value |
|-------------------------------------------------------------|--------|-----------|---------|------------|---------|
| Demographic characteristics                                 |        |           |         |            |         |
| Youth sex is female                                         | 34.0   | 34.1      | 33.8    | 0.3        | 0.90    |
| Youth age at RA                                             |        |           |         |            |         |
| 14 years                                                    | 39.0   | 39.3      | 38.8    | 0.5        | 0.86    |
| 15 years                                                    | 27.4   | 28.5      | 26.4    | 2.1        | 0.37    |
| 16 years                                                    | 33.6   | 32.3      | 34.8    | -2.6       | 0.30    |
| Average age                                                 | 15.4   | 15.4      | 15.4    | 0.0        | 0.64    |
| Youth language preference at SSI application                |        |           |         |            |         |
| English is preferred written language                       | 95.4   | 94.6      | 96.1    | -1.5       | 0.17    |
| English is preferred spoken language                        | 95.2   | 94.6      | 95.9    | -1.2       | 0.26    |
| Youth living arrangement at SSI application                 |        |           |         |            |         |
| In parents' household                                       | 87.8   | 87.6      | 88.0    | -0.5       | 0.78    |
| Own household or alone                                      | 11.5   | 11.3      | 11.7    | -0.4       | 0.80    |
| Another household and receiving support                     | 0.7    | 1.2       | 0.3     | 0.9        | 0.04*   |
| Youth race/ethnicity (from the 18-month survey)             |        |           |         |            |         |
| Non-Hispanic white                                          | 33.1   | 34.3      | 31.9    | 2.5        | 0.32    |
| Non-Hispanic black                                          | 39.8   | 38.8      | 40.8    | -2.0       | 0.43    |
| Hispanic                                                    | 14.2   | 15.3      | 13.1    | 2.2        | 0.22    |
| Non-Hispanic American Indian                                | 2.6    | 2.6       | 2.5     | 0.0        | 0.96    |
| Non-Hispanic other or mixed race                            | 8.6    | 7.6       | 9.7     | -2.1       | 0.16    |
| Missing                                                     | 1.7    | 1.4       | 2.1     | -0.7       | 0.35    |
| Enrolling parent age at RA (from the RA system)             | 41.6   | 41.7      | 41.5    | 0.3        | 0.51    |
| Parent race/ethnicity (from the 18-month survey)            |        |           |         |            |         |
| Non-Hispanic white                                          | 42.3   | 43.4      | 41.2    | 2.1        | 0.41    |
| Non-Hispanic black                                          | 38.5   | 37.8      | 39.3    | -1.5       | 0.56    |
| Hispanic                                                    | 9.5    | 10.7      | 8.4     | 2.3        | 0.13    |
| Non-Hispanic American Indian                                | 1.8    | 2.0       | 1.7     | 0.3        | 0.67    |
| Non-Hispanic other or mixed race                            | 6.3    | 4.4       | 8.2     | -3.8       | 0.00*** |
| Missing                                                     | 1.5    | 1.8       | 1.2     | 0.5        | 0.38    |
| Disability                                                  |        |           |         |            |         |
| Youth primary impairment                                    |        |           |         |            |         |
| Intellectual or developmental disability                    | 38.5   | 38.9      | 38.1    | 0.8        | 0.76    |
| Speech, hearing, or visual impairment                       | 1.3    | 1.6       | 0.9     | 0.6        | 0.27    |
| Physical disability                                         | 12.1   | 13.2      | 11.0    | 2.2        | 0.21    |
| Other mental impairment                                     | 44.0   | 41.6      | 46.4    | -4.9       | 0.06*   |
| Other or unknown disability                                 | 4.2    | 4.8       | 3.5     | 1.3        | 0.21    |
| SSA program participation                                   |        |           |         |            |         |
| Youth SSA payment status at RA                              |        |           |         |            |         |
| Received SSI                                                | 95.4   | 95.2      | 95.5    | -0.3       | 0.80    |
| Received OASDI                                              | 11.5   | 11.2      | 11.9    | -0.7       | 0.69    |
| Years since youth's earliest SSI eligibility at RA          | 8.4    | 8.5       | 8.4     | 0.1        | 0.66    |
| Youth age at most recent SSI application                    | 7.4    | 7.4       | 7.5     | 0.0        | 0.82    |
| Average youth payments in the year before RA (\$)           |        |           |         |            |         |
| SSI                                                         | 7,247  | 7,202     | 7,294   | -92        | 0.44    |
| OASDI                                                       | 311    | 283       | 339     | -56        | 0.34    |
| Total SSI and OASDI                                         | 7,558  | 7,485     | 7,633   | -148       | 0.16    |
| Household had multiple SSI-eligible children                | 22.5   | 22.2      | 22.7    | -0.5       | 0.83    |
| Enrolling parent provided a valid SSN at RA                 | 91.5   | 90.7      | 92.3    | -1.6       | 0.29    |
| Parents included in the SSA data analyses                   |        |           |         |            |         |
| None                                                        | 3.5    | 3.7       | 3.2     | 0.5        | 0.57    |
| One parent                                                  | 59.6   | 59.2      | 60.0    | -0.8       | 0.77    |
| Two parents                                                 | 36.9   | 37.0      | 36.8    | 0.2        | 0.93    |
| Parent SSA payment status at RA                             |        |           |         |            |         |
| Any parent received SSI only                                | 12.4   | 11.3      | 13.6    | -2.3       | 0.18    |
| Any parent received OASDI only                              | 8.2    | 7.7       | 8.7     | -0.9       | 0.53    |
| Any parent received both SSI and OASDI                      | 7.8    | 7.9       | 7.8     | 0.0        | 0.98    |
| No parent received any SSA payments                         | 68.1   | 69.4      | 66.7    | 2.6        | 0.28    |
| No parent was included in the SSA data analyses             | 3.5    | 3.7       | 3.2     | 0.5        | 0.57    |
| Earnings <sup>a</sup>                                       |        |           |         |            |         |
| Youth had earnings in the calendar year before RA           | 3.9    | 4.0       | 3.7     | 0.3        | 0.73    |
| Average youth earnings in the calendar year before RA (\$)  | 34     | 37        | 31      | 6          | 0.59    |
| Parent had earnings in the calendar year before RA          | 71.9   | 72.0      | 71.9    | 0.1        | 0.97    |
| Average parent earnings in the calendar year before RA (\$) | 14,173 | 14,143    | 14,203  | -59        | 0.94    |
| Sample size                                                 | 1,475  | 746       | 729     |            |         |



## PROMISE Early Impacts

Online Appendix Table A.1g. PROMISE pooled sample baseline characteristics (percentage, unless otherwise noted)

|                                                             | All    | Treatment | Control | Difference | p-value |
|-------------------------------------------------------------|--------|-----------|---------|------------|---------|
| Demographic characteristics                                 |        |           |         |            |         |
| Youth sex is female                                         | 33.5   | 32.8      | 34.1    | -1.3       | 0.18    |
| Youth age at RA                                             |        |           |         |            |         |
| 14 years                                                    | 35.8   | 35.9      | 35.8    | 0.1        | 0.91    |
| 15 years                                                    | 29.1   | 29.1      | 29.0    | 0.1        | 0.88    |
| 16 years                                                    | 35.1   | 35.0      | 35.2    | -0.3       | 0.79    |
| Average age                                                 | 15.5   | 15.5      | 15.5    | 0.0        | 0.90    |
| Youth language preference at SSI application                |        |           |         |            |         |
| English is preferred written language                       | 88.4   | 88.2      | 88.6    | -0.4       | 0.46    |
| English is preferred spoken language                        | 88.2   | 88.0      | 88.3    | -0.3       | 0.63    |
| Youth living arrangement at SSI application                 |        |           |         |            |         |
| In parents' household                                       | 84.2   | 84.2      | 84.3    | -0.1       | 0.86    |
| Own household or alone                                      | 13.7   | 13.8      | 13.5    | 0.3        | 0.70    |
| Another household and receiving support                     | 2.1    | 2.0       | 2.2     | -0.1       | 0.63    |
| Youth race/ethnicity (from the 18-month survey)             |        |           |         |            |         |
| Non-Hispanic white                                          | 20.5   | 20.9      | 20.1    | 0.8        | 0.32    |
| Non-Hispanic black                                          | 38.1   | 37.1      | 39.2    | -2.1       | 0.03**  |
| Hispanic                                                    | 28.2   | 29.0      | 27.4    | 1.6        | 0.05*   |
| Non-Hispanic American Indian                                | 2.3    | 2.2       | 2.4     | -0.2       | 0.58    |
| Non-Hispanic other or mixed race                            | 8.2    | 8.2       | 8.2     | 0.0        | 1.00    |
| Missing                                                     | 2.7    | 2.6       | 2.7     | -0.2       | 0.64    |
| Enrolling parent age at RA (from the RA system)             | 43.2   | 43.2      | 43.3    | 0.0        | 0.91    |
| Parent race/ethnicity (from the 18-month survey)            |        |           |         |            |         |
| Non-Hispanic white                                          | 25.8   | 26.0      | 25.6    | 0.4        | 0.65    |
| Non-Hispanic black                                          | 38.6   | 38.3      | 38.8    | -0.5       | 0.60    |
| Hispanic                                                    | 25.3   | 25.5      | 25.0    | 0.5        | 0.52    |
| Non-Hispanic American Indian                                | 1.9    | 1.8       | 2.0     | -0.1       | 0.60    |
| Non-Hispanic other or mixed race                            | 6.3    | 6.2       | 6.5     | -0.4       | 0.49    |
| Missing                                                     | 2.1    | 2.2       | 2.1     | 0.1        | 0.73    |
| Disability                                                  |        |           |         |            |         |
| Youth primary impairment                                    |        |           |         |            |         |
| Intellectual or developmental disability                    | 44.6   | 44.7      | 44.4    | 0.2        | 0.81    |
| Speech, hearing, or visual impairment                       | 1.7    | 1.7       | 1.7     | 0.0        | 0.93    |
| Physical disability                                         | 13.6   | 13.5      | 13.8    | -0.3       | 0.69    |
| Other mental impairment                                     | 35.8   | 35.5      | 36.1    | -0.6       | 0.53    |
| Other or unknown disability                                 | 4.3    | 4.6       | 3.9     | 0.7        | 0.10    |
| SSA program participation                                   |        |           |         |            |         |
| Youth SSA payment status at RA                              |        |           |         |            |         |
| Received SSI                                                | 94.3   | 94.0      | 94.7    | -0.7       | 0.14    |
| Received OASDI                                              | 10.9   | 11.2      | 10.7    | 0.5        | 0.43    |
| Years since youth's earliest SSI eligibility at RA          | 8.9    | 8.8       | 8.9     | 0.0        | 0.60    |
| Youth age at most recent SSI application                    | 7.1    | 7.1       | 7.1     | 0.0        | 0.96    |
| Average youth payments in the year before RA (\$)           |        |           |         |            |         |
| SSI                                                         | 7,303  | 7,293     | 7,314   | -22        | 0.65    |
| OASDI                                                       | 320    | 317       | 323     | -6         | 0.81    |
| Total SSI and OASDI                                         | 7,623  | 7,610     | 7,637   | -27        | 0.51    |
| Household had multiple SSI-eligible children                | 19.7   | 19.8      | 19.7    | 0.1        | 0.94    |
| Enrolling parent provided a valid SSN at RA                 | 76.7   | 76.8      | 76.6    | 0.3        | 0.75    |
| Parents included in the SSA data analyses                   |        |           |         |            |         |
| None                                                        | 6.7    | 6.4       | 7.1     | -0.7       | 0.14    |
| One parent                                                  | 60.0   | 60.0      | 60.0    | 0.0        | 0.97    |
| Two parents                                                 | 33.3   | 33.6      | 32.9    | 0.7        | 0.47    |
| Parent SSA payment status at RA                             |        |           |         |            |         |
| Any parent received SSI only                                | 9.8    | 9.6       | 10.0    | -0.4       | 0.56    |
| Any parent received OASDI only                              | 9.0    | 9.2       | 8.7     | 0.5        | 0.42    |
| Any parent received both SSI and OASDI                      | 5.6    | 5.9       | 5.4     | 0.5        | 0.34    |
| No parent received any SSA payments                         | 68.9   | 69.0      | 68.8    | 0.2        | 0.86    |
| No parent was included in the SSA data analyses             | 6.7    | 6.4       | 7.1     | -0.7       | 0.14    |
| Earnings <sup>a</sup>                                       |        |           |         |            |         |
| Youth had earnings in the calendar year before RA           | 3.3    | 3.3       | 3.2     | 0.2        | 0.61    |
| Average youth earnings in the calendar year before RA (\$)  | 34     | 33        | 36      | -2         | 0.76    |
| Parent had earnings in the calendar year before RA          | 70.1   | 69.8      | 70.4    | -0.6       | 0.52    |
| Average parent earnings in the calendar year before RA (\$) | 14,320 | 14,323    | 14,317  | 6          | 0.99    |
| Sample size                                                 | 9,330  | 4,726     | 4,604   |            |         |

Table notes shown after Online Appendix Table A.1g.



## PROMISE Early Impacts

Notes for Tables A.1a–A.1g:

Source: SSA administrative data unless otherwise noted.

Note: The sample includes all evaluation enrollees who were randomly assigned to either the treatment or control group and who responded to the youth survey. We weighted statistics to adjust for survey nonresponse. Youth living arrangements recorded as “living in own household or alone” in the SSA data include living in a residential facility, foster care, another relative’s household but paying a fair share of expenses, and in one’s own household. The primary impairment categories correspond to SSA’s Listing of Impairments. Other mental impairments include conditions such as chronic brain syndrome; schizophrenia; borderline intellectual functioning; and affective, anxiety, personality, substance addiction, somatoform, eating, conduct, oppositional/defiant, and attention deficit hyperactivity disorders.

\*/\*\*/\*\* Difference is significantly different from zero at the .10/.05/.01 level using a two-tailed *t*-test or a chi-square test.

<sup>a</sup> Sample for these measures comprises all enrollees and is not limited to survey respondents.

## PROMISE Early Impacts

Online Appendix Table A.2. Control variables for regression-adjusted analyses of impacts

| Project          | Regression covariates                                                                                                                                                                                                                                                                                                                                                                                                                                                                                                                                                                                                                                                                                                                          |
|------------------|------------------------------------------------------------------------------------------------------------------------------------------------------------------------------------------------------------------------------------------------------------------------------------------------------------------------------------------------------------------------------------------------------------------------------------------------------------------------------------------------------------------------------------------------------------------------------------------------------------------------------------------------------------------------------------------------------------------------------------------------|
| All projects     | Youth race/ethnicity (categories; non-Hispanic white is the omitted category); <sup>a</sup> Whether youth is female; Youth duration of SSI payments at random assignment; Whether youth household has multiple SSI-eligible children; Youth total disability payment amount in the 12 months before the month of random assignment; Youth primary impairment (categories; physical disability is the omitted category)                                                                                                                                                                                                                                                                                                                         |
| Arkansas PROMISE | Whether youth had SSI payment in the month of random assignment                                                                                                                                                                                                                                                                                                                                                                                                                                                                                                                                                                                                                                                                                |
| ASPIRE           | Whether youth had OASDI payment in the month of random assignment; Whether youth works or volunteers at baseline; Whether youth talked with parent/teacher/caseworker about post-secondary education at baseline; Whether youth talked with parent/teacher/caseworker about post-school employment at baseline; Whether parent expected youth to pursue post-secondary education at baseline; Whether parent expected youth to be employed in the future at baseline. Whether youth has difficulty with at least one activity of daily living at baseline; Whether youth has difficulty with at least one instrumental activity of daily living at baseline; Parent's self-assessment of financial knowledge at baseline; Region fixed effects |
| CaPROMISE        | Youth OASDI payments in the 12 months before the month of random assignment; Region fixed effects                                                                                                                                                                                                                                                                                                                                                                                                                                                                                                                                                                                                                                              |
| MD PROMISE       | Youth SSI payments in the 12 months before the month of random assignment                                                                                                                                                                                                                                                                                                                                                                                                                                                                                                                                                                                                                                                                      |
| NYS PROMISE      | Youth's living arrangements at the time of random assignment (categories; living with parents is the omitted category); Youth OASDI payments in the 12 months before the month of random assignment; Number of parents used in SSA data analysis (categories; one parent is the omitted category), Parent SSA beneficiary status (categories; no parent receiving any payments is the omitted category)                                                                                                                                                                                                                                                                                                                                        |
| WI PROMISE       | None                                                                                                                                                                                                                                                                                                                                                                                                                                                                                                                                                                                                                                                                                                                                           |

Note: We added the control variables shown for each project to the set of control variables shown for all projects.

<sup>a</sup>For parent outcomes, we controlled for parents' race and ethnicity.

## PROMISE Early Impacts

Online Appendix Table A.3a. Arkansas PROMISE impact statistics (percentages, unless otherwise noted)

|                                                                               |              |          |                |         | Sample size |         |
|-------------------------------------------------------------------------------|--------------|----------|----------------|---------|-------------|---------|
| Outcome                                                                       | Control mean | Impact   | Standard error | p-value | Treat-ment  | Control |
| Youth outcomes                                                                |              |          |                |         |             |         |
| Received any transition service since RA                                      | 82.3         | 13.4***  | 1.6            | 0.00    | 782         | 751     |
| Received any key transition services since RA                                 | 50.2         | 34.7***  | 2.2            | 0.00    | 776         | 749     |
| Applied for VR services since RA                                              | 4.2          | 3.2**    | 1.1            | 0.00    | 867         | 886     |
| Enrolled in school at survey                                                  | 90.8         | -1.6     | 1.6            | 0.30    | 749         | 718     |
| Received job-related training since RA                                        | 14.7         | 32.3***  | 2.3            | 0.00    | 744         | 718     |
| Employed in a paid job since RA                                               | 19.6         | 36.0***  | 2.4            | 0.00    | 749         | 719     |
| Earnings from employment year before survey (\$)                              | 747          | 1,213*** | 180            | 0.00    | 744         | 715     |
| Total income in year before survey (\$)                                       | 7,803        | 993***   | 211            | 0.00    | 745         | 716     |
| SSA payments since RA (\$)                                                    | 10,930       | -259*    | 132            | 0.05    | 904         | 901     |
| Family outcomes                                                               |              |          |                |         |             |         |
| Family received any support services since RA <sup>a</sup>                    | 40.9         | 24.4***  | 2.5            | 0.00    | 777         | 747     |
| Family received any key support services since RA <sup>a,b</sup>              | 26.4         | 24.7***  | 2.4            | 0.00    | 779         | 746     |
| Either parent received education or job skills training since RA <sup>a</sup> | 20.8         | 1.6      | 2.1            | 0.46    | 777         | 749     |
| Either parent employed in a paid job since RA                                 | 56.6         | -0.5     | 2.5            | 0.84    | 778         | 751     |
| Parents' total earnings and SSA payments in calendar year after RA (\$)       | 19,094       | 359      | 515            | 0.49    | 883         | 890     |

<sup>a</sup> Any family member other than the PROMISE-enrolled youth received service.

<sup>b</sup> Key support services include case management, employment-promoting services, benefits counseling, and financial education.

RA = random assignment

\*/\*\*/\*\*\* Impact estimate is significantly different from zero at the .10/.05/.01 level after a Benjamini-Hochberg adjustment for multiple comparison tests.

## PROMISE Early Impacts

Online Appendix Table A.3b. ASPIRE impact statistics (percentages, unless otherwise noted)

| Outcome                                                                       | Control mean | Impact  | Standard error | p-value | Sample size |         |
|-------------------------------------------------------------------------------|--------------|---------|----------------|---------|-------------|---------|
|                                                                               |              |         |                |         | Treat-ment  | Control |
| Youth outcomes                                                                |              |         |                |         |             |         |
| Received any transition service since RA                                      | 88.5         | 8.3***  | 1.3            | 0.00    | 812         | 783     |
| Received any key transition services since RA                                 | 62.1         | 20.8*** | 2.2            | 0.00    | 802         | 786     |
| Applied for VR services since RA                                              | 7.8          | 15.1*** | 1.6            | 0.00    | 896         | 966     |
| Enrolled in school at survey                                                  | 91.9         | -2.9    | 1.5            | 0.06    | 783         | 776     |
| Received job-related training since RA                                        | 14.0         | 6.9***  | 1.9            | 0.00    | 778         | 774     |
| Employed in a paid job since RA                                               | 18.3         | 4.6**   | 2.0            | 0.02    | 782         | 773     |
| Earnings from employment year before survey (\$)                              | 781          | 33      | 156            | 0.83    | 778         | 769     |
| Total income in year before survey (\$)                                       | 7,233        | 71      | 193            | 0.72    | 780         | 772     |
| SSA payments since RA (\$)                                                    | 10,132       | -21     | 146            | 0.89    | 978         | 975     |
| Family outcomes                                                               |              |         |                |         |             |         |
| Family received any support services since RA <sup>a</sup>                    | 45.3         | 19.3*** | 2.5            | 0.00    | 808         | 785     |
| Family received any key support services since RA <sup>a,b</sup>              | 29.3         | 18.7*** | 2.4            | 0.00    | 810         | 788     |
| Either parent received education or job skills training since RA <sup>a</sup> | 24.0         | 2.5     | 2.2            | 0.26    | 798         | 773     |
| Either parent employed in a paid job since RA                                 | 58.5         | -0.1    | 2.4            | 0.98    | 810         | 791     |
| Parents' total earnings and SSA payments in calendar year after RA (\$)       | 24,203       | -373    | 673            | 0.58    | 899         | 888     |

<sup>a</sup> Any family member other than the PROMISE-enrolled youth received service.

<sup>b</sup> Key support services include case management, employment-promoting services, benefits counseling, and financial education.

RA = random assignment

\*/\*\*/\*\*\* Impact estimate is significantly different from zero at the .10/.05/.01 level after a Benjamini-Hochberg adjustment for multiple comparison tests.

## PROMISE Early Impacts

Online Appendix Table A.3c. CaPROMISE impact statistics (percentages, unless otherwise noted)

| Outcome                                                                       | Control mean | Impact  | Standard error | p-value | Sample size |         |
|-------------------------------------------------------------------------------|--------------|---------|----------------|---------|-------------|---------|
|                                                                               |              |         |                |         | Treat-ment  | Control |
| Youth outcomes                                                                |              |         |                |         |             |         |
| Received any transition service since RA                                      | 91.3         | 4.3***  | 1.2            | 0.00    | 851         | 821     |
| Received any key transition services since RA                                 | 50.8         | 28.5*** | 2.3            | 0.00    | 845         | 799     |
| Applied for VR services since RA                                              | 3.8          | 21.3*** | 1.2            | 0.00    | 1,541       | 1,540   |
| Enrolled in school at survey                                                  | 93.2         | 0.6     | 1.3            | 0.66    | 834         | 799     |
| Received job-related training since RA                                        | 10.8         | 21.9*** | 2.0            | 0.00    | 829         | 799     |
| Employed in a paid job since RA                                               | 15.0         | 19.4*** | 2.1            | 0.00    | 832         | 799     |
| Earnings from employment year before survey (\$)                              | 448          | 343**   | 142            | 0.02    | 827         | 797     |
| Total income in year before survey (\$)                                       | 7,362        | 330     | 170            | 0.05    | 828         | 798     |
| SSA payments since RA (\$)                                                    | 10,732       | -26     | 107            | 0.81    | 1,548       | 1,549   |
| Family outcomes                                                               |              |         |                |         |             |         |
| Family received any support services since RA <sup>a</sup>                    | 39.7         | 13.5*** | 2.5            | 0.00    | 841         | 812     |
| Family received any key support services since RA <sup>a,b</sup>              | 22.9         | 13.5*** | 2.3            | 0.00    | 842         | 809     |
| Either parent received education or job skills training since RA <sup>a</sup> | 16.5         | 5.0**   | 2.0            | 0.01    | 846         | 820     |
| Either parent employed in a paid job since RA                                 | 55.3         | 1.1     | 2.4            | 0.65    | 848         | 820     |
| Parents' total earnings and SSA payments in calendar year after RA (\$)       | 24,106       | 463     | 532            | 0.38    | 1,311       | 1,318   |

<sup>a</sup> Any family member other than the PROMISE-enrolled youth received service.

<sup>b</sup> Key support services include case management, employment-promoting services, benefits counseling, and financial education.

RA = random assignment

\*/\*\*/\*\*\* Impact estimate is significantly different from zero at the .10/.05/.01 level after a Benjamini-Hochberg adjustment for multiple comparison tests.

## PROMISE Early Impacts

Online Appendix Table A.3d. MD PROMISE impact statistics (percentages, unless otherwise noted)

| Outcome                                                                       | Control mean | Impact  | Standard error | p-value | Sample size |         |
|-------------------------------------------------------------------------------|--------------|---------|----------------|---------|-------------|---------|
|                                                                               |              |         |                |         | Treat-ment  | Control |
| Youth outcomes                                                                |              |         |                |         |             |         |
| Received any transition service since RA                                      | 89.9         | 6.4***  | 1.3            | 0.00    | 793         | 776     |
| Received any key transition services since RA                                 | 65.2         | 17.8*** | 2.2            | 0.00    | 789         | 763     |
| Applied for VR services since RA                                              | 5.9          | 0.7     | 1.1            | 0.52    | 789         | 763     |
| Enrolled in school at survey                                                  | 84.1         | -0.4    | 1.9            | 0.83    | 758         | 742     |
| Received job-related training since RA                                        | 17.2         | 6.3***  | 2.1            | 0.00    | 756         | 741     |
| Employed in a paid job since RA                                               | 22.0         | 18.5*** | 2.3            | 0.00    | 756         | 738     |
| Earnings from employment year before survey (\$)                              | 831          | 531**   | 197            | 0.01    | 751         | 735     |
| Total income in year before survey (\$)                                       | 7,865        | 708***  | 219            | 0.00    | 752         | 738     |
| SSA payments since RA (\$)                                                    | 10,688       | 115     | 131            | 0.38    | 936         | 930     |
| Family outcomes                                                               |              |         |                |         |             |         |
| Family received any support services since RA <sup>a</sup>                    | 47.7         | 15.6*** | 2.5            | 0.00    | 781         | 771     |
| Family received any key support services since RA <sup>a,b</sup>              | 33.0         | 24.0*** | 2.5            | 0.00    | 785         | 771     |
| Either parent received education or job skills training since RA <sup>a</sup> | 23.7         | 0.9     | 2.2            | 0.66    | 782         | 769     |
| Either parent employed in a paid job since RA                                 | 54.5         | 2.7     | 2.5            | 0.28    | 781         | 773     |
| Parents' total earnings and SSA payments in calendar year after RA (\$)       | 20,498       | -546    | 536            | 0.31    | 883         | 870     |

<sup>a</sup> Any family member other than the PROMISE-enrolled youth received service.

<sup>b</sup> Key support services include case management, employment-promoting services, benefits counseling, and financial education.

RA = random assignment

\*/\*\*/\*\*\* Impact estimate is significantly different from zero at the .10/.05/.01 level after a Benjamini-Hochberg adjustment for multiple comparison tests.

## PROMISE Early Impacts

Online Appendix Table A.3e. NYS PROMISE impact statistics (percentages, unless otherwise noted)

| Outcome                                                                       | Control mean | Impact  | Standard error | p-value | Sample size |         |
|-------------------------------------------------------------------------------|--------------|---------|----------------|---------|-------------|---------|
|                                                                               |              |         |                |         | Treat-ment  | Control |
| Youth outcomes                                                                |              |         |                |         |             |         |
| Received any transition service since RA                                      | 91.4         | 2.7*    | 1.2            | 0.03    | 879         | 870     |
| Received any key transition services since RA                                 | 58.3         | 16.1*** | 2.3            | 0.00    | 867         | 861     |
| Applied for VR services since RA                                              | 1.7          | -0.2    | 0.6            | 0.79    | 978         | 978     |
| Enrolled in school at survey                                                  | 95.1         | -0.8    | 1.1            | 0.45    | 853         | 838     |
| Received job-related training since RA                                        | 14.2         | 9.0***  | 1.9            | 0.00    | 851         | 836     |
| Employed in a paid job since RA                                               | 23.1         | 5.8**   | 2.1            | 0.01    | 852         | 837     |
| Earnings from employment year before survey (\$)                              | 571          | 19      | 99             | 0.85    | 847         | 833     |
| Total income in year before survey (\$)                                       | 7,820        | 65      | 131            | 0.62    | 848         | 834     |
| SSA payments since RA (\$)                                                    | 11,292       | -10     | 116            | 0.93    | 986         | 981     |
| Family outcomes                                                               |              |         |                |         |             |         |
| Family received any support services since RA <sup>a</sup>                    | 49.7         | 7.9***  | 2.4            | 0.00    | 880         | 863     |
| Family received any key support services since RA <sup>a,b</sup>              | 29.6         | 9.9***  | 2.3            | 0.00    | 878         | 865     |
| Either parent received education or job skills training since RA <sup>a</sup> | 19.4         | 3.1     | 1.9            | 0.12    | 885         | 862     |
| Either parent employed in a paid job since RA                                 | 46.6         | 0.0     | 2.3            | 0.99    | 884         | 864     |
| Parents' total earnings and SSA payments in calendar year after RA (\$)       | 17,986       | 511     | 481            | 0.29    | 951         | 910     |

<sup>a</sup> Any family member other than the PROMISE-enrolled youth received service.

<sup>b</sup> Key support services include case management, employment-promoting services, benefits counseling, and financial education.

RA = random assignment

\*/\*\*/\*\*\* Impact estimate is significantly different from zero at the .10/.05/.01 level after a Benjamini-Hochberg adjustment for multiple comparison tests.



# PROMISE Early Impacts

Online Appendix Table A.3f. WI PROMISE impact statistics (percentages, unless otherwise noted)

|                                                                               |              |         |                |         | Sample size |         |
|-------------------------------------------------------------------------------|--------------|---------|----------------|---------|-------------|---------|
| Outcome                                                                       | Control mean | Impact  | Standard error | p-value | Treat-ment  | Control |
| Youth outcomes                                                                |              |         |                |         |             |         |
| Received any transition service since RA                                      | 89.7         | 4.9***  | 1.4            | 0.00    | 799         | 759     |
| Received any key transition services since RA                                 | 63.8         | 19.9*** | 2.2            | 0.00    | 800         | 755     |
| Applied for VR services since RA                                              | 14.0         | 82.9*** | 1.3            | 0.00    | 949         | 946     |
| Enrolled in school at survey                                                  | 90.6         | 1.9     | 1.4            | 0.18    | 746         | 729     |
| Received job-related training since RA                                        | 19.8         | 19.8*** | 2.3            | 0.00    | 742         | 728     |
| Employed in a paid job since RA                                               | 30.6         | 11.2*** | 2.5            | 0.00    | 745         | 729     |
| Earnings from employment year before survey (\$)                              | 882          | 394**   | 145            | 0.01    | 739         | 723     |
| Total income in year before survey (\$)                                       | 7,852        | 471**   | 180            | 0.01    | 740         | 724     |
| SSA payments since RA (\$)                                                    | 10,861       | 129     | 129            | 0.32    | 950         | 946     |
| Family outcomes                                                               |              |         |                |         |             |         |
| Family received any support services since RA <sup>a</sup>                    | 48.1         | 15.1*** | 2.5            | 0.00    | 793         | 759     |
| Family received any key support services since RA <sup>a,b</sup>              | 30.3         | 21.3*** | 2.5            | 0.00    | 788         | 761     |
| Either parent received education or job skills training since RA <sup>a</sup> | 27.7         | 0.1     | 2.3            | 0.96    | 785         | 760     |
| Either parent employed in a paid job since RA                                 | 57.7         | 3.8     | 2.5            | 0.13    | 788         | 758     |
| Parents' total earnings and SSA payments in calendar year after RA (\$)       | 20,160       | -73     | 523            | 0.89    | 917         | 914     |

<sup>a</sup> Any family member other than the PROMISE-enrolled youth received service.

<sup>b</sup> Key support services include case management, employment-promoting services, benefits counseling, and financial education.

RA = random assignment

\*/\*\*/\*\*\* Impact estimate is significantly different from zero at the .10/.05/.01 level after a Benjamini-Hochberg adjustment for multiple comparison tests.

## PROMISE Early Impacts

Online Appendix Table A.3g. PROMISE pooled impact statistics (percentages, unless otherwise noted)

| Outcome                                                                       | Control mean | Impact  | Standard error | p-value | Sample size |         |
|-------------------------------------------------------------------------------|--------------|---------|----------------|---------|-------------|---------|
|                                                                               |              |         |                |         | Treat-ment  | Control |
| Youth outcomes                                                                |              |         |                |         |             |         |
| Received any transition service since RA                                      | 88.8         | 6.6***  | 0.5            | 0.00    | 4,916       | 4,760   |
| Received any key transition services since RA                                 | 58.4         | 23.0*** | 0.9            | 0.00    | 4,879       | 4,713   |
| Applied for VR services since RA                                              | 6.2          | 20.7*** | 0.6            | 0.00    | 6,164       | 6,243   |
| Enrolled in school at survey                                                  | 91.0         | -0.6    | 0.6            | 0.33    | 4,723       | 4,602   |
| Received job-related training since RA                                        | 15.1         | 16.1*** | 0.9            | 0.00    | 4,700       | 4,596   |
| Employed in a paid job since RA                                               | 21.4         | 15.9*** | 0.9            | 0.00    | 4,716       | 4,595   |
| Earnings from employment year before survey (\$)                              | 710          | 424***  | 65             | 0.00    | 4,719       | 4,592   |
| Total income in year before survey (\$)                                       | 7,656        | 422***  | 77             | 0.00    | 4,726       | 4,604   |
| SSA payments since RA (\$)                                                    | 10,772       | -47     | 53             | 0.37    | 6,302       | 6,282   |
| Family outcomes                                                               |              |         |                |         |             |         |
| Family received any support services since RA <sup>a</sup>                    | 45.2         | 15.9*** | 1.0            | 0.00    | 4,880       | 4,737   |
| Family received any key support services since RA <sup>a,b</sup>              | 28.6         | 18.6*** | 1.0            | 0.00    | 4,882       | 4,740   |
| Either parent received education or job skills training since RA <sup>a</sup> | 22.0         | 2.2**   | 0.9            | 0.01    | 4,873       | 4,733   |
| Either parent employed in a paid job since RA                                 | 54.9         | 1.2     | 1.0            | 0.24    | 4,889       | 4,757   |
| Parents' total earnings and SSA payments in calendar year after RA (\$)       | 23,011       | 280     | 396            | 0.48    | 5,844       | 5,790   |

<sup>a</sup> Any family member other than the PROMISE-enrolled youth received service.

<sup>b</sup> Key support services include case management, employment-promoting services, benefits counseling, and financial education.

RA = random assignment

\*/\*\*/\*\* Impact estimate is significantly different from zero at the .10/.05/.01 level after a Benjamini-Hochberg adjustment for multiple comparison tests.
